# Supplementary material for: Non-matrix-matched standardisation in LA-ICP-MS analysis: general approach, and application to allanite Th–U–Pb dating
Source: Royal Society of Chemistry journal article supplement (doi:10.1039/c7ja00095b), 2017-01-01
Supplement: c7ja00095b2.xlsx [file c7ja00095b2.xlsx]

## Sheet: Tab. SP1
Tab. SP1. Isotope ratios, common lead fractions and age data for TARA allanite.
Name	Ø (μm)	208Pb/232Th	2s	206Pb/238U	2s	206Pb/208Pb	2s	207Pb/206Pb	2s		208Pb/232Th_rad	2s	206Pb/238U_rad	2s			f208	2s	f206	2s		Th-age	2s	238U-age	2s
14octb08	32	0.0207684	0.000589297	0.0786665	0.00261249	0.0230462	0.000647906	0.179614	0.0124819		0.0206132	0.000585358	0.0665404	0.00252681			0.00746926	0.000778034	0.154145	0.0154608		412.21	11.5924	415.279	15.2715
14octb09	32	0.0207374	0.0005879	0.0801057	0.00304366	0.0224405	0.000732309	0.199298	0.021274		0.0205627	0.000583311	0.065804	0.00327538			0.00842341	0.00127295	0.178536	0.0263431		411.212	11.5525	410.826	19.809
04nova10	32	0.0207486	0.000638999	0.0743798	0.00357685	0.0242164	0.00112196	0.151681	0.0182397		0.0206223	0.000636204	0.0654849	0.00357567			0.00608897	0.001185	0.119587	0.0225857		412.384	12.5993	408.896	21.6304
04nova11	32	0.0207034	0.000637676	0.0782913	0.0035277	0.0262184	0.0011525	0.156153	0.016204		0.0205606	0.000634254	0.068492	0.00346752			0.0068995	0.00114804	0.125165	0.0200738		411.147	12.5614	427.064	20.9176
23mayb14	32	0.0205965	0.00073013	0.0800116	0.00311727	0.0241529	0.000882388	0.178693	0.0138665		0.0204363	0.000725138	0.0677583	0.00298062			0.00777597	0.000917923	0.153143	0.0171794		408.701	14.3631	422.636	17.9933
23mayb15	32	0.0204771	0.00071379	0.0807806	0.0030978	0.0247324	0.000872863	0.166783	0.0133109		0.0203296	0.000709064	0.0695933	0.00298773			0.00720005	0.000894509	0.13849	0.016481		406.588	14.0462	433.705	18.0053
23mayb16	32	0.0202707	0.000705415	0.0748635	0.0031366	0.0223477	0.00084944	0.175401	0.0122717		0.0201286	0.000701949	0.0636858	0.00290653			0.0070129	0.000762682	0.149307	0.0152039		402.626	13.908	398.002	17.613
02junb11	32	0.0211035	0.000601461	0.0795396	0.00342862	0.0254303	0.00110359	0.179113	0.0163698		0.0209305	0.000597373	0.0673478	0.00332918			0.00819767	0.00114061	0.153279	0.0202609		418.464	11.8267	420.157	20.1047
02junb12	32	0.0204841	0.000583002	0.0830992	0.0031725	0.027991	0.00106046	0.193885	0.0174583		0.0202767	0.000577848	0.0688004	0.0031796			0.010124	0.00132943	0.172068	0.0216192		405.509	11.4475	428.925	19.1759
02junb13	32	0.0207935	0.000601785	0.082687	0.00310598	0.0275301	0.00103722	0.180103	0.0146111		0.0206072	0.000597755	0.0698906	0.00302599			0.00895781	0.0011001	0.154756	0.01809		412.053	11.838	435.497	18.2308
02junb14	32	0.0205442	0.000587825	0.0840938	0.00319186	0.0271984	0.000987191	0.190587	0.01697		0.020347	0.00058361	0.0699718	0.00319742			0.00960136	0.00125145	0.167932	0.0210237		406.906	11.5608	435.986	19.2621
06juna09	32	0.0206196	0.000873877	0.0795061	0.00348457	0.0230198	0.000934235	0.198684	0.0166133		0.0204421	0.000866782	0.0653641	0.00330806			0.00860794	0.00105656	0.177872	0.0205835		408.822	17.1686	408.165	20.0143
06juna10	32	0.0204487	0.000861252	0.0777447	0.00303937	0.0234487	0.000896612	0.170878	0.0134337		0.020304	0.000856604	0.0665824	0.00291084			0.0070769	0.000863871	0.143576	0.0166404		406.09	16.9693	415.533	17.5914
06junb15	32	0.0210755	0.000281187	0.0862094	0.00444221	0.0216087	0.00105681	0.221654	0.0242745		0.0208782	0.000280151	0.0684566	0.00438429			0.0093579	0.00143987	0.205927	0.0300177		417.458	5.5467	426.851	26.4476
06junb16	32	0.0205288	0.000262258	0.0805683	0.00368869	0.0212281	0.000913453	0.181961	0.0195661		0.0203847	0.000261389	0.0679009	0.00367678			0.00701627	0.00112361	0.157226	0.0242333		407.705	5.1777	423.497	22.1922
06junb17	32	0.0205434	0.000270432	0.0759543	0.00313246	0.0221676	0.000898485	0.178826	0.0156548		0.0203966	0.000269657	0.0643076	0.00303607			0.00714569	0.000948901	0.153338	0.0193815		407.931	5.3414	401.769	18.3874
06junb18	32	0.020934	0.000278336	0.0818734	0.00377504	0.0189196	0.000819872	0.186704	0.0203593		0.0207985	0.000277372	0.068547	0.00378172			0.00647581	0.00104227	0.162768	0.0252085		415.909	5.4921	427.396	22.8116
09juna09	32	0.0202267	0.000516566	0.0796845	0.00332571	0.0241529	0.000896664	0.166936	0.0132723		0.0200841	0.000513779	0.0686191	0.003157			0.00704902	0.000875129	0.138865	0.0164365		401.733	10.1801	427.831	19.0424
09juna10	32	0.020681	0.000507677	0.0830995	0.00321218	0.025142	0.000932876	0.203556	0.0158625		0.02048	0.000503232	0.06782	0.00309115			0.00971882	0.00110055	0.183871	0.019655		409.553	9.9673	423.008	18.6594
09junb11	32	0.0206984	0.000253409	0.083856	0.00360835	0.0187516	0.000716946	0.1864	0.0182851		0.0205657	0.000252567	0.070223	0.00357025			0.00640954	0.000926136	0.162576	0.0226312		411.306	5.0021	437.499	21.5027
09junb12	32	0.021062	0.000286572	0.0869201	0.00434797	0.0188984	0.000807822	0.1944	0.0196767		0.0209179	0.000285613	0.0719532	0.00418509			0.00684367	0.00101192	0.172191	0.0243494		418.269	5.6546	447.912	25.1637
09junb13	32	0.0205861	0.000403703	0.0822173	0.00353967	0.0258942	0.00102296	0.172677	0.0162919		0.0204228	0.000402233	0.0702373	0.00345551			0.00793197	0.00114452	0.145712	0.0202046		408.42	7.9673	437.585	20.8112
09junb14	32	0.0207339	0.000353108	0.0843115	0.00401209	0.0256556	0.00110041	0.199926	0.0203402		0.0205334	0.000351059	0.0691913	0.00392307			0.00967321	0.00142134	0.179337	0.0251732		410.605	6.9529	431.282	23.6497
09junb15	32	0.0206318	0.000334458	0.0801027	0.00308537	0.0245951	0.000876432	0.173408	0.0121337		0.0204754	0.000332685	0.0683616	0.00290025			0.00757897	0.000823388	0.146575	0.0150299		409.472	6.5894	426.277	17.4982
09junb16	32	0.0207774	0.000294305	0.0824358	0.00304968	0.0242771	0.000909709	0.171682	0.0217573		0.0206243	0.000294153	0.0705382	0.00342921			0.00736699	0.0014029	0.144325	0.0269387		412.421	5.8253	439.398	20.6477
04novb10	24	0.0205468	0.000862224	0.0779542	0.00715462	0.0212132	0.00158769	0.173825	0.048379		0.020412	0.000858473	0.0664842	0.00771919			0.00656164	0.00271916	0.147138	0.0598045		408.245	17.0046	414.939	46.6356
04novb11	24	0.0209818	0.000884318	0.0830177	0.00763108	0.0194137	0.00147198	0.186737	0.0641583		0.0208423	0.000883062	0.0695045	0.00923123			0.00664541	0.00328987	0.162775	0.0794557		416.772	17.4842	433.17	55.611
06junc17	24	0.0210103	0.000855289	0.0771601	0.00427589	0.0254793	0.00114618	0.227526	0.0237717		0.0207702	0.000846941	0.0607034	0.00407178			0.0114272	0.00165977	0.213281	0.0294312		415.286	16.7702	379.902	24.7419
06junc18	24	0.0207775	0.000837231	0.0762568	0.00399271	0.0253315	0.00121146	0.175824	0.0200158		0.0206121	0.000831558	0.0648595	0.00389753			0.00796033	0.00137538	0.149459	0.0247735		412.169	16.4682	405.111	23.5909
06junc19	24	0.0208024	0.000844229	0.0845251	0.00477929	0.0277445	0.00142821	0.160156	0.0277796		0.0206446	0.000839089	0.0735323	0.00508564			0.00758677	0.00204585	0.130054	0.034393		412.795	16.6168	457.401	30.5319
06junc20	24	0.0209099	0.000838283	0.0781134	0.00432061	0.0236227	0.00119826	0.179091	0.0191835		0.0207506	0.00083236	0.0661314	0.00411114			0.0076195	0.00124195	0.153392	0.0237442		414.923	16.4819	412.807	24.8537
06junc21	24	0.0208935	0.000822472	0.077348	0.00420103	0.0239778	0.00125339	0.163929	0.0182528		0.0207516	0.000817933	0.0669339	0.00403988			0.00678854	0.00119651	0.134639	0.0226218		414.943	16.1962	417.657	24.4043
06jund12	24	0.0205531	0.000744317	0.0742782	0.00446997	0.0215245	0.00121822	0.187737	0.0341784		0.0204003	0.000740227	0.0620697	0.00489958			0.00743719	0.00195807	0.164362	0.0422254		408.008	14.6625	388.2	29.7326
06jund13	24	0.0207033	0.000735615	0.0719157	0.00470586	0.0207394	0.0012102	0.170674	0.0269871		0.0205741	0.000732334	0.0616234	0.00471404			0.00624047	0.00150482	0.143116	0.0334295		411.457	14.5037	385.491	28.6178
06jund14	24	0.0205873	0.000741641	0.0791256	0.00468278	0.0211315	0.00117474	0.188597	0.0219274		0.020436	0.000736484	0.0660384	0.00447068			0.0073476	0.00127533	0.165397	0.0271724		408.719	14.5879	412.244	27.0287
06jund15	24	0.0207354	0.000741827	0.0797856	0.00509953	0.0215218	0.00119896	0.222738	0.0367568		0.0205407	0.000737073	0.0632261	0.00544945			0.00939125	0.00212767	0.20755	0.0455208		410.781	14.598	395.215	33.0325
06jund16	24	0.0207558	0.000746825	0.0811308	0.00449262	0.0261417	0.00123005	0.154279	0.0236933		0.0206157	0.000743045	0.0711675	0.00461746			0.00674993	0.00164476	0.122806	0.0293306		412.238	14.7152	443.186	27.7827
09junc07	24	0.0202785	0.000599393	0.0902775	0.00538778	0.02419	0.00123912	0.191142	0.0313492		0.0201045	0.00059685	0.0750378	0.00569891			0.00858239	0.00202401	0.16881	0.038823		402.133	11.8259	466.435	34.165
09junc08	24	0.0207623	0.000501572	0.0805839	0.00430435	0.0258158	0.00123732	0.171178	0.0211295		0.0206003	0.00049895	0.0690023	0.00425742			0.00780099	0.00146793	0.143721	0.0261406		411.933	9.8813	430.142	25.6689
09junc09	24	0.021014	0.000626975	0.0784797	0.00400394	0.0257092	0.00122361	0.211913	0.0186433		0.0207936	0.000621329	0.0632584	0.00371034			0.0104855	0.00134752	0.193951	0.0231084		415.749	12.3026	395.411	22.4919
09junc10	24	0.0205677	0.00051398	0.0835158	0.00455687	0.0275127	0.00150274	0.199324	0.0260061		0.0203551	0.00051071	0.0685885	0.0046205			0.0103373	0.00194952	0.178736	0.0322142		407.063	10.1167	427.646	27.8687

## Sheet: Tab. SP2
Tab. SP2. Isotope ratios, common lead fractions and age data for CAPb allanite.
Name	Comment	Ø (μm)	208Pb/232Th	2s	206Pb/238U	2s	206Pb/208Pb	2s	207Pb/206Pb	2s		208Pb/232Th_rad	2s	206Pb/238U_rad	2s		f208	2s	f206	2s		Th-age	2s		238U-age	2s
14octb6		32	0.0135513	0.000384933	0.0524562	0.00201233	0.0233908	0.000788739	0.174855	0.0271364		0.0134495	0.00038272	0.0443961	0.002463		0.00751577	0.00167593	0.153654	0.0338605		269.965	7.63297	2.8274	280.024	15.2016	5.42868
14octb7		32	0.0134147	0.000380327	0.0514967	0.00175292	0.0239801	0.000689048	0.192593	0.014977		0.0132963	0.000377355	0.0424388	0.00173638		0.0088193	0.000971564	0.175893	0.018707		266.909	7.5271	2.8201	267.932	10.7373	4.00746
04nova08		32	0.0140688	0.000444037	0.0545149	0.00296662	0.0270796	0.00131438	0.156939	0.0219461		0.0139644	0.00044163	0.0473765	0.00298813		0.00741787	0.00159436	0.130945	0.027385		280.214	8.80339	3.14166	298.395	18.389	6.16264
04nova09		32	0.0139608	0.000433775	0.0554211	0.00335423	0.0263139	0.0015801	0.153107	0.0257167		0.0138638	0.000431955	0.0484247	0.00343652		0.00694859	0.00181653	0.12624	0.0320799		278.213	8.61139	3.09525	304.843	21.1265	6.9303
23mayb07		32	0.013961	0.00048751	0.0555758	0.00287414	0.0276741	0.00129643	0.167409	0.0186726		0.0138446	0.000483944	0.0475683	0.00278656		0.00834052	0.00140391	0.144082	0.0232689		277.824	9.64803	3.47271	299.575	17.1456	5.72332
23mayb08		32	0.0138419	0.000485077	0.0554869	0.00212955	0.0274575	0.00100777	0.163304	0.0168769		0.0137313	0.000482355	0.0477716	0.00217684		0.00798537	0.00124377	0.139047	0.0210368		275.57	9.61742	3.49001	300.826	13.3921	4.45178
23mayb09		32	0.0136975	0.000473297	0.0544299	0.00240045	0.0272784	0.00115936	0.172152	0.0178287		0.0135802	0.000469885	0.0462551	0.00237621		0.00856805	0.00132168	0.150189	0.0222493		272.558	9.37018	3.43787	291.489	14.6396	5.02236
23mayb10		32	0.0136788	0.000483191	0.0532408	0.00248585	0.0271614	0.00110674	0.17516	0.0175343		0.0135592	0.000480116	0.0450441	0.00241194		0.00874509	0.00129455	0.153955	0.0219045		272.139	9.57439	3.51819	284.023	14.8768	5.23787
02junb07		32	0.013851	0.000389463	0.0487204	0.00166602	0.0531424	0.00186148	0.105455	0.00980281		0.013748	0.000388051	0.0454602	0.00166626		0.0074378	0.00138479	0.0669153	0.0122285		275.832	7.737	2.80496	286.59	10.2738	3.58485
02junb08		32	0.0141422	0.000394657	0.0513836	0.00231717	0.0256285	0.00104805	0.171293	0.0203906		0.0140294	0.000392102	0.0437383	0.00236976		0.00797742	0.00140298	0.148789	0.0254423		281.512	7.8156	2.7763	275.963	14.635	5.30325
02junb09		32	0.0139299	0.000399561	0.0502314	0.00196587	0.0276484	0.00104247	0.169721	0.0154825		0.0138115	0.000396635	0.042848	0.00194001		0.00850064	0.00116274	0.146988	0.0193176		277.165	7.90765	2.85304	270.462	11.9915	4.43372
02junb10		32	0.014034	0.000399243	0.0509267	0.00194796	0.0258701	0.000915142	0.18632	0.0155051		0.0139067	0.000396673	0.0423909	0.00189933		0.00907041	0.0010948	0.167609	0.0193243		279.066	7.90767	2.83362	267.636	11.7452	4.3885
06juna11		32	0.0137221	0.000613314	0.0531442	0.00347814	0.0654078	0.00368471	0.150643	0.0233726		0.0134904	0.000606488	0.0465844	0.00343017		0.0168834	0.00410957	0.123435	0.0291802		270.66	12.0953	4.46882	293.517	21.124	7.19686
06juna12		32	0.0138338	0.000576438	0.0531032	0.00230292	0.0279923	0.00117097	0.177486	0.0163685		0.0137068	0.000571647	0.0447795	0.00222927		0.00917703	0.00125739	0.156746	0.0204316		275.078	11.398	4.14356	282.39	13.7537	4.87046
06junb07		32	0.0138535	0.000174061	0.0513028	0.00208526	0.0282292	0.00112058	0.181577	0.0181317		0.0137212	0.000173503	0.0430002	0.00209906		0.00955532	0.00138966	0.161836	0.0226334		275.363	3.45942	1.25631	271.403	12.9727	4.77987
06junb08	outlier	32	0.0144377	0.000181582	0.0473954	0.00222968	0.0298732	0.0014124	0.208453	0.0248494		0.0142618	0.000181767	0.0381571	0.00232288		0.0121837	0.0020222	0.194919	0.0309899		286.122	3.62225	1.26598	241.4	14.4227	5.9746
06junb09		32	0.0138244	0.000172659	0.050654	0.00196416	0.0360607	0.00130791	0.15617	0.0167686		0.0136887	0.000172521	0.0440596	0.00201019		0.0098186	0.00161801	0.130184	0.0209226		274.694	3.43995	1.25228	277.948	12.4109	4.46519
06junb10		32	0.0137704	0.000185754	0.0548181	0.00266455	0.0253652	0.00120227	0.213237	0.0283426		0.0136233	0.000185852	0.0437785	0.00288386		0.0106833	0.00194476	0.201386	0.0353515		273.42	3.706	1.35543	276.212	17.8091	6.44764
09juna07		32	0.0137346	0.00033443	0.0530276	0.00233772	0.028501	0.00119411	0.164569	0.0169815		0.0136194	0.000332432	0.0455664	0.00230654		0.00838696	0.00131132	0.140704	0.0211739		273.336	6.62891	2.42518	287.244	14.2198	4.95042
09juna08	outlier	32	0.0145499	0.000406038	0.0528055	0.0015387	0.0361841	0.000997483	0.161616	0.010618		0.0143996	0.000402669	0.0455996	0.00150137		0.0103328	0.00104285	0.136461	0.0132408		288.849	8.02331	2.77769	287.449	9.25606	3.22008
09junb07	outlier	32	0.015403	0.000308796	0.0518987	0.00165852	0.0360775	0.000942757	0.130862	0.00781617		0.0152895	0.000306806	0.0468362	0.00158144		0.00736914	0.000760554	0.0975444	0.00973504		306.556	6.10785	1.99241	295.068	9.73807	3.30027
09junb08	outlier	32	0.0150114	0.000283124	0.0527415	0.00176985	0.0375133	0.00109283	0.151094	0.0086245		0.0148663	0.000281015	0.046253	0.00165335		0.00966084	0.000890145	0.123024	0.0107547		298.132	5.59674	1.87727	291.476	10.1865	3.49479
09junb09	outlier	32	0.0143791	0.000248329	0.0458786	0.00127331	0.0920573	0.00248296	0.0815784	0.00557115		0.0142771	0.000247955	0.0441889	0.0012686		0.00709436	0.0013535	0.0368306	0.00695671		286.247	4.94118	1.72619	278.745	7.83161	2.80959
09junb10		32	0.0136494	0.000194683	0.0570916	0.00288758	0.0243492	0.00110065	0.184998	0.0197335		0.0135338	0.000193993	0.0476006	0.0027922		0.00846516	0.00131345	0.166242	0.0246404		271.642	3.86868	1.42418	299.774	17.1798	5.73093
09junb17		32	0.0137136	0.000176177	0.0556706	0.00220591	0.0335486	0.00120241	0.203278	0.0176461		0.0135317	0.000175239	0.0451466	0.00216986		0.0132629	0.00161697	0.18904	0.0220172		271.57	3.49468	1.28684	284.655	13.3827	4.70137
09junb18		32	0.013941	0.000189059	0.0600833	0.00273514	0.0272007	0.00118759	0.213075	0.019675		0.0137815	0.000188209	0.048003	0.00263889		0.0114391	0.00148463	0.201059	0.0245335		276.566	3.75242	1.35679	302.249	16.2306	5.36995
04novb08		24	0.0136674	0.00059291	0.055886	0.00518417	0.0362351	0.00345169	0.278407	0.0551006		0.0133744	0.000586131	0.0400777	0.00537542		0.0214325	0.00561354	0.282868	0.0686952		268.421	11.6907	4.35534	253.314	33.3063	13.1482
04novb09		24	0.0136653	0.000590871	0.0516881	0.00438188	0.0296847	0.00214231	0.166613	0.0420026		0.0135437	0.000587682	0.0442807	0.00465293		0.00889648	0.0033208	0.143309	0.0523657		271.825	11.7196	4.31146	279.313	28.7141	10.2803
06junc07		24	0.0141962	0.000568254	0.068417	0.00404613	0.0279335	0.00141326	0.280206	0.0390851		0.0139601	0.000560419	0.0489461	0.00442105		0.0166301	0.00297132	0.284592	0.0487091		280.115	11.1714	3.98813	308.048	27.1657	8.81865
06junc08		24	0.0141264	0.000562333	0.0540878	0.00370222	0.0250739	0.00150426	0.182638	0.0441815		0.0140056	0.000559901	0.0452744	0.00431465		0.00854729	0.0029422	0.162946	0.0551412		281.039	11.1605	3.97117	285.444	26.6039	9.3202
06junc09		24	0.0139449	0.000570831	0.0510515	0.00309993	0.0249407	0.00148342	0.204481	0.0436799		0.0138065	0.00056724	0.0413351	0.00375447		0.00992895	0.00290763	0.190326	0.0544858		277.071	11.309	4.08164	261.103	23.2389	8.90027
06junc10		24	0.0139984	0.000577385	0.055363	0.00414818	0.0280913	0.00192061	0.155433	0.0598982		0.0138922	0.000576962	0.0482146	0.00550951		0.00758729	0.00442555	0.129119	0.0746542		278.774	11.5019	4.12589	303.551	33.8743	11.1594
06junc11		24	0.0140059	0.000568982	0.0541615	0.00386243	0.026399	0.00189205	0.203737	0.0474693		0.0138595	0.000565666	0.0439057	0.00449335		0.0104564	0.00335666	0.189356	0.0591435		278.123	11.2771	4.05471	276.997	27.7419	10.0152
06jund07		24	0.0135548	0.000482026	0.0494296	0.00363171	0.028498	0.00189647	0.193519	0.0310346		0.0134119	0.000477843	0.0406825	0.00356672		0.0105454	0.0024181	0.176961	0.0387625		269.199	9.53046	3.5403	257.062	22.0891	8.5929
06jund08		24	0.0140056	0.000502975	0.0590617	0.00401165	0.0297961	0.00181291	0.223077	0.0396524		0.0138193	0.000498154	0.0464521	0.00431477		0.0133062	0.00318984	0.213498	0.0494345		277.309	9.93155	3.5814	292.703	26.5748	9.0791
06jund09		24	0.0137684	0.000496007	0.0520486	0.00297316	0.0301584	0.00155343	0.124566	0.0237581		0.0136896	0.000494249	0.0473238	0.00312065		0.00572595	0.00189435	0.0907777	0.0296361		274.734	9.85496	3.58709	298.07	19.2053	6.4432
06jund10		24	0.013965	0.000502456	0.0652976	0.00481328	0.0278166	0.00186609	0.190065	0.0409894		0.0138249	0.000500202	0.0540442	0.00522254		0.0100275	0.00305347	0.17234	0.0510888		277.431	9.97232	3.59452	339.303	31.9322	9.4111
06jund11		24	0.0137009	0.000501803	0.0565913	0.00395374	0.0254588	0.00162962	0.21021	0.031364		0.0135567	0.000497802	0.0454052	0.0038798		0.010524	0.00219215	0.197664	0.0390904		272.093	9.92711	3.64843	286.25	23.9194	8.35612
09junc15		24	0.0139308	0.000359698	0.0533081	0.00323853	0.0293964	0.00167565	0.161094	0.0214742		0.0138141	0.000357677	0.0460458	0.00315278		0.0083767	0.00171763	0.136232	0.0267804		277.212	7.13094	2.57238	290.199	19.4263	6.69414
09junc16		24	0.0136386	0.000386641	0.0521914	0.00304556	0.0304262	0.00168072	0.150214	0.0217023		0.013532	0.000384919	0.0457788	0.00303234		0.00781789	0.0017789	0.122866	0.027079		271.59	7.67621	2.8264	288.554	18.6892	6.47686
09junc17		24	0.0138676	0.00037607	0.0561409	0.00422153	0.026067	0.00187857	0.181467	0.0388895		0.0137453	0.000375105	0.047064	0.00448219		0.00881513	0.00272536	0.161681	0.0485044		275.851	7.4789	2.71121	296.471	27.5885	9.30563
09junc18		24	0.0137451	0.00040734	0.0556933	0.00365566	0.0273644	0.00175391	0.190487	0.0487958		0.013609	0.00040692	0.0460567	0.00455742		0.00990239	0.00354584	0.17303	0.0608453		273.131	8.11433	2.97086	290.266	28.0802	9.67395

## Sheet: Tab. SP3
Tab. SP3. Isotope ratios, common lead fractions and age data for Bonab allanite.
Name	Ø (μm)	208Pb/232Th	2s	206Pb/238U	2s	206Pb/208Pb	2s	207Pb/206Pb	2s		208Pb/232Th_rad	2s	206Pb/238U_rad	2s		f208	2s	f206	2s		Th-age	2s		238U-age	2s
14octa13	32	0.00177035	5.12693e-05	0.0261022	0.000949269	0.100984	0.00324679	0.682281	0.0389893		0.00147242	4.73899e-05	0.0051235	0.00130141		0.16829	0.0116826	0.803714	0.0493296		29.7618	0.956448	0.0321368	32.9439	8.34663	0.253359
14octa14	32	0.0017368	5.03475e-05	0.025664	0.000830619	0.103448	0.0028705	0.648716	0.0358539		0.00145319	4.60372e-05	0.00612598	0.00118129		0.163296	0.0107397	0.761301	0.0453608		29.3734	0.929164	0.0316329	39.3701	7.56867	0.192244
14octa15	32	0.00179994	5.23235e-05	0.0273387	0.000931963	0.104425	0.00326324	0.651862	0.0662571		0.0015017	5.52942e-05	0.00641881	0.00230137		0.165691	0.0188606	0.765212	0.0837686		30.3533	1.11594	0.0367652	41.2461	14.7409	0.357389
04nova15	32	0.00203376	6.94531e-05	0.0487918	0.00341954	0.134577	0.00904541	0.675046	0.0924262		0.00158289	9.09427e-05	0.010031	0.00575463		0.221694	0.0359329	0.794412	0.116845		31.9684	1.83525	0.0574083	64.3419	36.7269	0.570808
04nova16	32	0.00183726	6.42232e-05	0.0343569	0.00250507	0.103637	0.00748651	0.685353	0.100698		0.00151843	7.67242e-05	0.00661261	0.00440864		0.173538	0.0301504	0.807532	0.127313		30.6916	1.54842	0.0504509	42.4873	28.2326	0.664495
04nova17	32	0.00185952	6.78256e-05	0.0308549	0.00179607	0.110141	0.00674195	0.695473	0.0686709		0.00151113	6.9691e-05	0.00554351	0.00269897		0.187352	0.0229291	0.820336	0.0867232		30.5464	1.40649	0.0460443	35.6371	17.3024	0.485518
23maya11	32	0.00187225	6.77774e-05	0.0277575	0.00121385	0.116382	0.00493025	0.640322	0.0398009		0.00153311	6.16434e-05	0.00692331	0.00143213		0.181136	0.0143929	0.750579	0.0503693		30.9905	1.24404	0.0401428	44.4767	9.16851	0.206142
23maya12	32	0.00183857	6.61968e-05	0.0260127	0.00117032	0.113846	0.0046613	0.577015	0.0396377		0.00154754	6.09949e-05	0.00857061	0.00136085		0.158292	0.0134983	0.670522	0.0501011		31.2794	1.23094	0.039353	55.0143	8.69794	0.158103
23maa13	32	0.00203051	7.66532e-05	0.0235356	0.000906324	0.160379	0.00625203	0.635716	0.0348882		0.0015276	6.78977e-05	0.0060071	0.00106644		0.247679	0.0176028	0.744765	0.0442151		30.8526	1.37027	0.0444135	38.6084	6.83363	0.176999
02juna15	32	0.00180422	5.52396e-05	0.0286932	0.00143657	0.103533	0.00524346	0.687001	0.0449254		0.00149062	5.31261e-05	0.00546161	0.00165564		0.173815	0.0150561	0.809655	0.0568348		30.1301	1.0722	0.0355856	35.112	10.6148	0.302313
02juna16	32	0.00178413	5.50841e-05	0.0293634	0.00159406	0.110041	0.00608749	0.640659	0.0465866		0.00147838	5.43662e-05	0.00730917	0.00177899		0.171375	0.016488	0.751079	0.0590131		29.8835	1.09724	0.0367172	46.9466	11.3847	0.242502
02juna17	32	0.00187495	6.01703e-05	0.0338162	0.00162912	0.118829	0.00593406	0.705015	0.0542914		0.00149038	6.05452e-05	0.00566653	0.00234203		0.205108	0.0198062	0.832431	0.0687202		30.1302	1.22193	0.040555	36.4257	15.0124	0.412139
02juna18	32	0.00185353	5.81969e-05	0.0308565	0.00145975	0.115784	0.00541062	0.670184	0.0514694		0.0015027	5.78064e-05	0.00653002	0.00203466		0.189276	0.0179787	0.788375	0.0651019		30.3771	1.16664	0.0384053	41.9584	13.0309	0.310568
06juna07	32	0.0018711	8.01974e-05	0.0317049	0.00145707	0.116331	0.00529224	0.647918	0.0422796		0.00152799	7.15551e-05	0.00760316	0.00172951		0.183374	0.0153615	0.76019	0.0533884		30.8872	1.44408	0.0467534	48.8277	11.0648	0.22661
06juna08	32	0.00185175	7.93548e-05	0.0295329	0.00152057	0.0980282	0.00466484	0.661389	0.0457819		0.00155921	7.16844e-05	0.0065806	0.00174319		0.15798	0.0139699	0.777177	0.0578364		31.5128	1.44665	0.0459066	42.2823	11.1637	0.264027
06junb11	32	0.00177034	3.2851e-05	0.0329884	0.00186308	0.103076	0.00554268	0.672095	0.0639014		0.00147111	4.40586e-05	0.00689997	0.00269529		0.169025	0.0195408	0.790837	0.0807695		29.7357	0.889214	0.0299039	44.3273	17.2555	0.389275
06junb12	32	0.00180836	3.38042e-05	0.0354225	0.00207187	0.107188	0.00529716	0.698311	0.0553445		0.00147719	4.28e-05	0.00623529	0.00250972		0.183132	0.01802	0.823973	0.070011		29.8603	0.863808	0.0289283	40.0705	16.0781	0.401246
06junb13	32	0.00216583	3.9138e-05	0.0256817	0.000942544	0.191841	0.00699109	0.692217	0.0337418		0.00146257	5.20651e-05	0.00471794	0.00111187		0.324705	0.0207154	0.816292	0.0427291		29.5403	1.05082	0.0355723	30.3423	7.1339	0.235114
06junb14	32	0.00189481	3.8313e-05	0.0442067	0.00251661	0.109902	0.00604069	0.717988	0.0592228		0.0015283	4.90637e-05	0.00668502	0.00333744		0.193429	0.0201267	0.848778	0.074915		30.8936	0.990174	0.0320511	42.951	21.3712	0.497571
09juna11	32	0.0018577	5.17396e-05	0.0194536	0.000831319	0.129256	0.00546213	0.627719	0.0410753		0.0014919	5.13468e-05	0.00516106	0.00103515		0.196911	0.0162362	0.734699	0.0519388		30.1615	1.03629	0.0343579	33.1848	6.63868	0.200052
09juna12	32	0.00188517	4.87132e-05	0.0218147	0.000803835	0.14555	0.00551793	0.612971	0.0325872		0.00147777	4.74711e-05	0.00619375	0.000929579		0.21611	0.0149223	0.716074	0.04128		29.8469	0.958081	0.0320998	39.8043	5.95552	0.14962
09juna13	32	0.00181805	4.74162e-05	0.0295523	0.00127141	0.114667	0.00497858	0.653788	0.0414699		0.00148621	4.72189e-05	0.00686592	0.00157967		0.182524	0.0148035	0.767669	0.0524802		30.0433	0.952983	0.0317203	44.1093	10.1137	0.229286
09juna14	32	0.00178774	5.08505e-05	0.0300396	0.00138095	0.103955	0.00457426	0.717596	0.0465892		0.00146082	4.95376e-05	0.00455455	0.00178421		0.182869	0.0150514	0.848382	0.0589463		29.5292	0.999804	0.0338581	29.2939	11.4495	0.390849
09juna15	32	0.00177698	4.54287e-05	0.0356839	0.00167521	0.105273	0.00483376	0.720651	0.0455497		0.0014464	4.58695e-05	0.00527174	0.00207613		0.186034	0.0152415	0.852266	0.0577067		29.2385	0.925786	0.0316633	33.8945	13.3133	0.392787
09juna16	32	0.00178187	4.91368e-05	0.0372363	0.00192581	0.110668	0.00558655	0.669453	0.057562		0.00145987	5.27346e-05	0.00791229	0.00274043		0.180709	0.0190364	0.787512	0.0727079		29.5108	1.06433	0.0360657	50.8052	17.527	0.344984
09juna17	32	0.001778	4.75796e-05	0.0352916	0.0019504	0.115992	0.00633887	0.647392	0.0606543		0.00145317	5.39212e-05	0.00848314	0.0027532		0.182695	0.0210153	0.759627	0.0767706		29.3763	1.08829	0.0370465	54.4552	17.5985	0.323174
09juna18	32	0.00177841	4.6996e-05	0.0373609	0.00187406	0.102098	0.0048873	0.704283	0.0560688		0.00146534	4.93809e-05	0.00629373	0.00266917		0.176037	0.0172319	0.831542	0.0708681		29.6197	0.996638	0.0336478	40.4448	17.0988	0.422768
04novb15	24	0.00186592	8.64432e-05	0.0225867	0.00207763	0.122366	0.0104407	0.587361	0.164185		0.00154226	0.000124794	0.00714621	0.00475506		0.173458	0.054946	0.683609	0.207777		31.1753	2.51849	0.0807847	45.9036	30.4341	0.663
04novb16	24	0.00186236	8.78819e-05	0.0309359	0.0023482	0.115894	0.00848152	0.679899	0.0723304		0.00150403	8.6079e-05	0.00616689	0.0028732		0.192407	0.0261445	0.800656	0.0913926		30.4042	1.73724	0.057138	39.6323	18.4077	0.464463
04novb17	24	0.00189731	8.83601e-05	0.0286243	0.00182793	0.126992	0.00749489	0.629381	0.101863		0.00152921	9.85078e-05	0.0075353	0.00371821		0.194009	0.0358138	0.736751	0.128661		30.9144	1.98802	0.0643073	48.3936	23.7893	0.49158
06junc12	24	0.00177734	7.64598e-05	0.0274404	0.00195917	0.0985594	0.00699784	0.73814	0.0955007		0.00145976	7.99663e-05	0.00344764	0.00332822		0.178685	0.0278157	0.874359	0.120715		29.5067	1.61394	0.0546974	22.1867	21.3812	0.963694
06junc13	24	0.00189496	8.47154e-05	0.0323169	0.00232536	0.116174	0.00724178	0.742289	0.0875213		0.00149346	8.74652e-05	0.00389244	0.00359756		0.211876	0.0298478	0.879554	0.110762		30.1928	1.76523	0.0584653	25.0436	23.101	0.922434
06junc14	24	0.00174964	7.28613e-05	0.0237116	0.00173716	0.0969562	0.00662353	0.769967	0.098603		0.00142792	7.71606e-05	0.0020238	0.00296833		0.183875	0.0281208	0.914649	0.124764		28.8641	1.55736	0.0539549	13.0331	19.0963	1.46522
06junc15	24	0.00187172	8.23941e-05	0.0322962	0.00249179	0.105468	0.00777984	0.671916	0.0993861		0.00154814	8.8697e-05	0.00676599	0.00410454		0.172883	0.0303848	0.790502	0.125771		31.2916	1.78999	0.0572037	43.4695	26.2809	0.604583
06junc16	24	0.00176601	7.65132e-05	0.033365	0.00234609	0.109209	0.00704846	0.629236	0.0721259		0.00147142	7.58934e-05	0.00878679	0.00310997		0.166809	0.0233418	0.736646	0.0911298		29.7427	1.53172	0.0514991	56.3959	19.8727	0.352379
06jund17	24	0.00184193	7.50531e-05	0.0426745	0.00293531	0.119056	0.00753991	0.720594	0.0808502		0.00145444	7.93121e-05	0.00630808	0.00439175		0.21037	0.028589	0.852181	0.102214		29.405	1.60075	0.054438	40.5368	28.1329	0.69401
06jund18	24	0.00191199	7.89271e-05	0.0441358	0.00399443	0.118163	0.00918141	0.74466	0.243737		0.00149855	0.000160665	0.00518404	0.0136546		0.216238	0.0775383	0.882543	0.308196		30.2961	3.24253	0.107028	33.3322	87.5678	2.62713
06jund19	24	0.00185819	7.56642e-05	0.0450338	0.00385879	0.123444	0.00970688	0.705648	0.0895995		0.00146186	8.62831e-05	0.00750828	0.00515532		0.213284	0.0335833	0.833274	0.113238		29.526	1.74143	0.0589796	48.2207	32.9841	0.684024
06jund20	24	0.00219638	8.34766e-05	0.0224265	0.00132649	0.213328	0.0124283	0.639664	0.0504911		0.00146788	9.37511e-05	0.00561029	0.00147385		0.331679	0.0343095	0.749837	0.0639014		29.6475	1.89214	0.0638214	36.0652	9.44784	0.261966
06jund21	24	0.00174138	6.76487e-05	0.0309435	0.00191635	0.110165	0.00661293	0.654357	0.0656		0.00143571	6.73937e-05	0.00716476	0.00260778		0.175533	0.0217185	0.768457	0.08292		29.0224	1.36022	0.0468681	46.0223	16.6908	0.362668
09junc11	24	0.00185228	5.62125e-05	0.0398098	0.00260186	0.135041	0.00798772	0.635747	0.0773732		0.00146595	7.14548e-05	0.010156	0.00396658		0.208573	0.0301541	0.744887	0.0980461		29.6083	1.44215	0.0487075	65.1396	25.3123	0.388585
09junc12	24	0.00176633	5.35677e-05	0.0332771	0.0026489	0.105973	0.00816949	0.683908	0.0948784		0.00145358	6.86298e-05	0.00646249	0.00404238		0.17706	0.0297991	0.805797	0.120182		29.3828	1.38515	0.0471415	41.5259	25.8906	0.62348
09junc13	24	0.00176872	5.24162e-05	0.0316353	0.00250454	0.10082	0.00750106	0.679028	0.0927674		0.00147307	6.53965e-05	0.00633973	0.00375389		0.167157	0.0275654	0.799599	0.117313		29.7748	1.31987	0.0443283	40.7396	24.0459	0.590234
09junc14	24	0.00189495	6.26721e-05	0.0373915	0.00309028	0.116367	0.00871205	0.762179	0.139985		0.00148128	9.97774e-05	0.00356267	0.00664879		0.218299	0.0458636	0.90472	0.177184		29.9474	2.01374	0.0672426	22.9256	42.708	1.8629

## Sheet: Tab. SP4
Tab. SP4. Statistical parameters of common lead corrected single spot ages
	Th-age			U-age
	BONA	CAP	TARA	BONA	CAP	TARA
number of analyses	44/44	37/42	41/41	44	37/42	41/41
error-weighted mean age (Ma)	29.99	274.4	411.3	39.4	283.8	421
error-weighted mean 2σ (Ma)	0.18	1.1	1.4	1.9	2.8	3.4
2 standard deviation (Ma)	0.7	3.7	4.2	10	16	13.5
MSWD (Ma)	1.1	0.83	0.82	1.6	2.5	2.1
error-weighted MSWD (Ma)	1.1	1.2	1.6	2.4	3.3	2
reduced χ2	1.1	0.82	0.82	3.9	3.8	3
Probability of fit	0.38	0.76	0.78	0	0	0
